# Supplementary material
Source: PubMed Central journal article supplement (PMC4877305)
Supplement: NIHMS782733-supplement-2.pdf [file NIHMS782733-supplement-2.pdf]

**Gallstone disorders**Robust Poisson  
Regression

---

| <b>Parameter</b>            |                      | <b>Risk Ratio</b> | <b>95% Confidence Limits</b> |       | <b>p-value</b> |
|-----------------------------|----------------------|-------------------|------------------------------|-------|----------------|
| <b>SIMVASTATIN</b>          | Yes vs No            | 0.252             | 0.229                        | 0.277 | <.0001         |
| <b>Age</b>                  | Age 30-39 vs 18-20   | 0.780             | 0.688                        | 0.884 | 0.0001         |
|                             | Age 40-49 vs 18-20   | 0.811             | 0.717                        | 0.918 | 0.0009         |
|                             | Age 50-59 vs 18-20   | 1.116             | 0.988                        | 1.261 | 0.0786         |
|                             | Age 60-69 vs 18-20   | 1.586             | 1.393                        | 1.805 | <.0001         |
|                             | Age 70+ vs 18-20     | 1.738             | 1.527                        | 1.979 | <.0001         |
| <b>Gender</b>               | Male vs Female       | 1.301             | 1.209                        | 1.401 | <.0001         |
| <b>Race/Ethnicity</b>       | ASIAN vs White       | 1.106             | 0.967                        | 1.264 | 0.1406         |
|                             | BLACK vs White       | 1.081             | 0.949                        | 1.230 | 0.2402         |
|                             | HISP vs White        | 1.184             | 1.095                        | 1.281 | <.0001         |
|                             | OTHER vs White       | 0.417             | 0.315                        | 0.553 | <.0001         |
| <b>Hypertriglyceridemia</b> | Yes vs No            | 3.975             | 3.041                        | 5.196 | <.0001         |
| <b>Chronic alcohol</b>      | Yes vs No            | 1.755             | 1.539                        | 2.000 | <.0001         |
| <b>Smoking</b>              | Ever-smoker vs Never | 1.049             | 0.975                        | 1.128 | 0.2026         |

---

**No history of  
gallstone disorder**

Robust Poisson  
regression

---

| <b>Parameter</b>            |                      | <b>Risk Ratio</b> | <b>95% Confidence Limits</b> |        | <b>p-value</b> |
|-----------------------------|----------------------|-------------------|------------------------------|--------|----------------|
| <b>SIMVASTATIN</b>          | Yes vs No            | 0.326             | 0.295                        | 0.360  | <.0001         |
| <b>Age</b>                  | Age 30-39 vs 18-20   | 1.047             | 0.910                        | 1.206  | 0.5195         |
|                             | Age 40-49 vs 18-20   | 1.103             | 0.962                        | 1.263  | 0.1596         |
|                             | Age 50-59 vs 18-20   | 1.369             | 1.191                        | 1.574  | <.0001         |
|                             | Age 60-69 vs 18-20   | 1.837             | 1.578                        | 2.139  | <.0001         |
|                             | Age 70+ vs 18-20     | 2.502             | 2.140                        | 2.925  | <.0001         |
| <b>Gender</b>               | Male vs Female       | 1.059             | 0.980                        | 1.145  | 0.1467         |
| <b>Race/Ethnicity</b>       | ASIAN vs White       | 0.905             | 0.775                        | 1.057  | 0.2076         |
|                             | BLACK vs White       | 1.563             | 1.399                        | 1.746  | <.0001         |
|                             | HISP vs White        | 1.169             | 1.070                        | 1.278  | 0.0006         |
|                             | OTHER vs White       | 0.124             | 0.092                        | 0.169  | <.0001         |
| <b>Hypertriglyceridemia</b> | Yes vs No            | 23.176            | 20.158                       | 26.645 | <.0001         |
| <b>Chronic alcohol</b>      | Yes vs No            | 10.419            | 9.522                        | 11.401 | <.0001         |
| <b>Smoking</b>              | Ever-smoker vs Never | 1.573             | 1.448                        | 1.709  | <.0001         |

---

**Chronic Alcohol Use**Robust Poisson  
regression

---

| <b>Parameter</b>            |                      | <b>Risk Ratio</b> | <b>95% Confidence Limits</b> |        | <b>p-value</b> |
|-----------------------------|----------------------|-------------------|------------------------------|--------|----------------|
| <b>SIMVASTATIN</b>          | Yes vs No            | 0.221             | 0.183                        | 0.268  | <.0001         |
| <b>Age</b>                  | Age 30-39 vs 18-20   | 1.049             | 0.838                        | 1.314  | 0.6752         |
|                             | Age 40-49 vs 18-20   | 0.874             | 0.703                        | 1.086  | 0.2235         |
|                             | Age 50-59 vs 18-20   | 0.815             | 0.649                        | 1.024  | 0.0795         |
|                             | Age 60-69 vs 18-20   | 0.957             | 0.742                        | 1.234  | 0.7366         |
|                             | Age 70+ vs 18-20     | 0.628             | 0.456                        | 0.866  | 0.0046         |
| <b>Gender</b>               | Male vs Female       | 1.375             | 1.197                        | 1.580  | <.0001         |
| <b>Race/Ethnicity</b>       | ASIAN vs White       | 1.606             | 1.160                        | 2.223  | 0.0043         |
|                             | BLACK vs White       | 1.786             | 1.498                        | 2.130  | <.0001         |
|                             | HISP vs White        | 1.030             | 0.893                        | 1.188  | 0.6884         |
|                             | OTHER vs White       | 0.197             | 0.123                        | 0.318  | <.0001         |
| <b>Hypertriglyceridemia</b> | Yes vs No            | 10.244            | 8.165                        | 12.853 | <.0001         |
| <b>Gallstone disorder</b>   | Yes vs No            | 5.048             | 4.355                        | 5.851  | <.0001         |
| <b>Smoking</b>              | Ever-smoker vs Never | 1.165             | 1.014                        | 1.338  | 0.0305         |

---

**No history of chronic alcohol Use**  
 Robust Poisson regression

| <b>Parameter</b>            |                      | <b>Risk Ratio</b> | <b>95% Confidence Limits</b> |        | <b>p-value</b> |
|-----------------------------|----------------------|-------------------|------------------------------|--------|----------------|
| <b>SIMVASTATIN</b>          | Yes vs No            | 0.291             | 0.271                        | 0.314  | <.0001         |
| <b>Age</b>                  | Age 30-39 vs 18-20   | 0.855             | 0.771                        | 0.948  | 0.003          |
|                             | Age 40-49 vs 18-20   | 0.935             | 0.846                        | 1.034  | 0.189          |
|                             | Age 50-59 vs 18-20   | 1.355             | 1.227                        | 1.496  | <.0001         |
|                             | Age 60-69 vs 18-20   | 1.905             | 1.712                        | 2.119  | <.0001         |
|                             | Age 70+ vs 18-20     | 2.374             | 2.132                        | 2.642  | <.0001         |
| <b>Gender</b>               | Male vs Female       | 1.120             | 1.056                        | 1.187  | 0.0002         |
| <b>Race/Ethnicity</b>       | ASIAN vs White       | 0.983             | 0.883                        | 1.094  | 0.753          |
|                             | BLACK vs White       | 1.248             | 1.133                        | 1.373  | <.0001         |
|                             | HISP vs White        | 1.246             | 1.168                        | 1.329  | <.0001         |
|                             | OTHER vs White       | 0.180             | 0.142                        | 0.228  | <.0001         |
| <b>Hypertriglyceridemia</b> | Yes vs No            | 13.231            | 11.353                       | 15.422 | <.0001         |
| <b>Gallstone disorder</b>   | Yes vs No            | 31.381            | 29.548                       | 33.328 | <.0001         |
| <b>Smoking</b>              | Ever-smoker vs Never | 1.262             | 1.190                        | 1.338  | <.0001         |

### Hypertriglyceridemia

Robust Poisson  
regression

| <b>Parameter</b>          |                      | <b>Risk Ratio</b> | <b>95% Confidence Limits</b> |       | <b>p-value</b> |
|---------------------------|----------------------|-------------------|------------------------------|-------|----------------|
| <b>SIMVASTATIN</b>        | Yes vs No            | 0.169             | 0.125                        | 0.229 | <.0001         |
| <b>Age</b>                | Age 30-39 vs 18-20   | 0.662             | 0.491                        | 0.892 | 0.0066         |
|                           | Age 40-49 vs 18-20   | 0.406             | 0.297                        | 0.556 | <.0001         |
|                           | Age 50-59 vs 18-20   | 0.247             | 0.162                        | 0.377 | <.0001         |
|                           | Age 60-69 vs 18-20   | 0.182             | 0.088                        | 0.375 | <.0001         |
|                           | Age 70+ vs 18-20     | 0.116             | 0.028                        | 0.482 | 0.003          |
| <b>GENDER</b>             | Male vs Female       | 0.552             | 0.434                        | 0.703 | <.0001         |
| <b>RACE</b>               | ASIAN vs White       | 1.023             | 0.680                        | 1.539 | 0.9133         |
|                           | BLACK vs White       | 1.654             | 1.080                        | 2.532 | 0.0207         |
|                           | HISP vs White        | 0.946             | 0.729                        | 1.228 | 0.6769         |
|                           | OTHER vs White       | 0.179             | 0.073                        | 0.438 | 0.0002         |
| <b>Gallstone disorder</b> | Yes vs No            | 3.075             | 2.245                        | 4.211 | <.0001         |
| <b>Chronic alcohol</b>    | Yes vs No            | 5.302             | 4.055                        | 6.933 | <.0001         |
| <b>Smoking</b>            | Ever-smoker vs Never | 1.031             | 0.812                        | 1.310 | 0.801          |

**No history of  
hypertriglyceridemia**

| <b>Parameter</b>          |                      | <b>Risk Ratio</b> | <b>95% Confidence Limits</b> |        | <b>p-value</b> |
|---------------------------|----------------------|-------------------|------------------------------|--------|----------------|
| <b>SIMVASTATIN</b>        | Yes vs No            | 0.296             | 0.276                        | 0.318  | <.0001         |
| <b>age</b>                | Age 30-39 vs 18-20   | 0.883             | 0.792                        | 0.984  | 0.0246         |
|                           | Age 40-49 vs 18-20   | 0.987             | 0.891                        | 1.094  | 0.8004         |
|                           | Age 50-59 vs 18-20   | 1.318             | 1.190                        | 1.460  | <.0001         |
|                           | Age 60-69 vs 18-20   | 1.801             | 1.615                        | 2.009  | <.0001         |
|                           | Age 70+ vs 18-20     | 2.120             | 1.896                        | 2.370  | <.0001         |
| <b>GENDER</b>             | Male vs Female       | 1.172             | 1.107                        | 1.240  | <.0001         |
| <b>Race/Ethnicity</b>     | ASIAN vs White       | 0.968             | 0.868                        | 1.079  | 0.5562         |
|                           | BLACK vs White       | 1.289             | 1.179                        | 1.411  | <.0001         |
|                           | HISP vs White        | 1.206             | 1.132                        | 1.285  | <.0001         |
|                           | OTHER vs White       | 0.210             | 0.166                        | 0.265  | <.0001         |
| <b>Gallstone disorder</b> | Yes vs No            | 22.760            | 21.507                       | 24.083 | <.0001         |
| <b>Chronic alcohol</b>    | Yes vs No            | 4.619             | 4.265                        | 5.003  | <.0001         |
| <b>Smoking</b>            | Ever-smoker vs Never | 1.294             | 1.221                        | 1.371  | <.0001         |
